# Supplementary material for: Effect of bimetallic iron:zinc nanoparticles on collagen stabilization
Source: Royal Society of Chemistry journal article supplement (doi:10.1039/c5tb02047f), 2016-01-01

## SUPPLEMENTARY INFORMATION

### Effect of bimetallic Iron: Zinc nanoparticle on collagen stabilization

K.V. Srivatsan<sup>a</sup>, Rachita Lakra<sup>a</sup>, K. Purna Sai<sup>a,b</sup> and M. S. Kiran<sup>a,b</sup>

<sup>a</sup> Council of Scientific and Industrial Research, Central Leather Research Institute, Adyar, Chennai 600020, India

<sup>b</sup> Academy of Scientific and Innovative Research, New Delhi, India

#### Supplementary figure 1

Representative image of collagen sheets a) collagen control b) collagen cross-linked with iron: zinc nanoparticle.

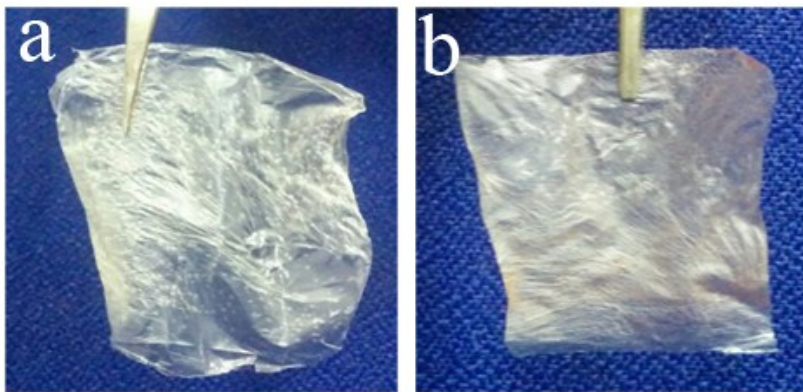

Supplement: c5tb02047f1.pdf [file c5tb02047f1.pdf]
